# Supplementary material for: Bis- and tris-(3-aminopropyl) derivatives of 14-membered tetraazamacrocycles containing pyridine: synthesis, protonation and complexation studies
Source: Royal Society of Chemistry journal article supplement (doi:10.1039/b603484e), 2006-01-01
Supplement: b603484e.pdf [file b603484e.pdf]

## Supplementary Material

**Table S1.** Protonation constants ( $\log K_{\text{H}_h\text{L}_l}$ ) of ligands  $\text{L}^1$ ,  $\text{L}^2$ ,  $\text{L}^5 - \text{L}^7$ ,  $\text{L}^{12}$ ,  $\text{L}^{13}$  and stability constants ( $\log K_{\text{M}_m\text{H}_h\text{L}_l}$ ) of their metal complexes with divalent metal ions ( $T = 298.2 \text{ K}$  and  $I = 0.10 \text{ mol dm}^{-3} \text{ KNO}_3$ ).

| Ion                                                                        | Equilibrium quotient                                                       | $\text{L}^1$ <sup>a</sup> | $\text{L}^2$ <sup>a</sup> | $\text{L}^5$ ( $\text{L}^6$ ) <sup>b</sup> | $\text{L}^7$ <sup>c</sup> | $\text{L}^{12}$ <sup>d</sup> | $\text{L}^{13}$ <sup>e</sup> |
|----------------------------------------------------------------------------|----------------------------------------------------------------------------|---------------------------|---------------------------|--------------------------------------------|---------------------------|------------------------------|------------------------------|
| $\text{H}^+$                                                               | $[\text{HL}]/[\text{L}]\times[\text{H}]$                                   | 10.570                    | 10.74                     | 9.74 (9.92)                                | 11.1                      | 10.83                        | 10.511 (10.58) <sup>f</sup>  |
|                                                                            | $[\text{H}_2\text{L}]/[\text{HL}]\times[\text{H}]$                         | 9.836                     | 10.08                     | 8.67 (8.56)                                | 10.1                      | 10.15                        | 9.824 (9.92) <sup>f</sup>    |
|                                                                            | $[\text{H}_3\text{L}]/[\text{H}_2\text{L}]\times[\text{H}]$                | 8.92                      | 9.49                      | 4.67 (4.66)                                | 9.4                       | 9.30                         | 9.129 (9.28) <sup>f</sup>    |
|                                                                            | $[\text{H}_4\text{L}]/[\text{H}_3\text{L}]\times[\text{H}]$                | 5.80                      | 7.76                      | –                                          | 8.5                       | 8.45                         | 5.615 (5.80) <sup>f</sup>    |
|                                                                            | $[\text{H}_5\text{L}]/[\text{H}_4\text{L}]\times[\text{H}]$                | 4.03                      | 5.57                      | –                                          | 3.4                       | 7.30                         | –                            |
|                                                                            | $[\text{H}_6\text{L}]/[\text{H}_5\text{L}]\times[\text{H}]$                | –                         | 3.52                      | –                                          | 1.9                       | 4.98                         | –                            |
| $\text{Ni}^{2+}$                                                           | $[\text{ML}]/[\text{M}]\times[\text{L}]$                                   | 13.07                     | 12.65                     | – (16.27)                                  | –                         | 12.23                        | 8.702                        |
|                                                                            | $[\text{MHL}]/[\text{ML}]\times[\text{H}]$                                 | 9.23                      | 9.16                      | –                                          | –                         | 9.7                          | 5.27                         |
|                                                                            | $[\text{MH}_2\text{L}]/[\text{MHL}]\times[\text{H}]$                       | 5.82                      | 9.00                      | –                                          | –                         | 8.46                         | –                            |
|                                                                            | $[\text{MH}_3\text{L}]/[\text{MH}_2\text{L}]\times[\text{H}]$              | –                         | 5.34                      | –                                          | –                         | 6.2                          | –                            |
|                                                                            | $[\text{M}_2\text{L}]/[\text{ML}]\times[\text{M}]$                         | 4.08                      | 5.03                      | –                                          | –                         | –                            | –                            |
|                                                                            | $[\text{M}_2\text{L}]/[\text{M}_2\text{LOH}]\times[\text{H}]$              | 8.50                      | 7.64                      | –                                          | –                         | 7.83*                        | –                            |
|                                                                            | $[\text{M}_2\text{LOH}]/[\text{M}_2\text{L}(\text{OH})_2]\times[\text{H}]$ | –                         | 10.00                     | –                                          | –                         | 10.5                         | –                            |
| $\text{Cu}^{2+}$                                                           | $[\text{ML}]/[\text{M}]\times[\text{L}]$                                   | 20.12                     | 18.08                     | 20.23 (19.76)                              | 19.8                      | 19.35                        | 13.117 (13.21) <sup>f</sup>  |
|                                                                            | $[\text{MHL}]/[\text{ML}]\times[\text{H}]$                                 | 8.76                      | 9.44                      | –                                          | 10.1                      | 9.75                         | 10.757 (10.92) <sup>f</sup>  |
|                                                                            | $[\text{MH}_2\text{L}]/[\text{MHL}]\times[\text{H}]$                       | 6.26                      | 8.30                      | –                                          | 5.9                       | 7.69                         | –                            |
|                                                                            | $[\text{MH}_3\text{L}]/[\text{MH}_2\text{L}]\times[\text{H}]$              | 1.88                      | 6.527                     | –                                          | 3.7                       | 4.06                         | –                            |
|                                                                            | $[\text{MH}_4\text{L}]/[\text{MH}_3\text{L}]\times[\text{H}]$              | –                         | 2.32                      | –                                          | –                         | –                            | –                            |
|                                                                            | $[\text{ML}]/[\text{MLOH}]\times[\text{H}]$                                | 11.73                     | 11.61                     | –                                          | 10.53                     | –                            | 9.789 (9.9) <sup>f</sup>     |
|                                                                            | $[\text{MLOH}]/[\text{ML}(\text{OH})_2]\times[\text{H}]$                   | –                         | –                         | –                                          | 14.13                     | –                            | –                            |
|                                                                            | $[\text{M}_2\text{L}]/[\text{ML}]\times[\text{M}]$                         | 6.38                      | 10.55                     | –                                          | –                         | 7.82                         | –                            |
|                                                                            | $[\text{M}_2\text{L}]/[\text{M}_2\text{LOH}]\times[\text{H}]$              | 5.94                      | 9.14                      | –                                          | –                         | 7.81                         | –                            |
| $[\text{M}_2\text{LOH}]/[\text{M}_2\text{L}(\text{OH})_2]\times[\text{H}]$ | 9.10                                                                       | 10.70                     | –                         | –                                          | 9.4                       | –                            |                              |
| $\text{Zn}^{2+}$                                                           | $[\text{ML}]/[\text{M}]\times[\text{L}]$                                   | 13.07                     | 12.24                     | 11.91 (12.816)                             | 18.91                     | 10.53                        | 10.702                       |
|                                                                            | $[\text{MHL}]/[\text{ML}]\times[\text{H}]$                                 | 8.98                      | 9.28                      | –                                          | 5.97                      | 9.56                         | –                            |
|                                                                            | $[\text{MH}_2\text{L}]/[\text{MHL}]\times[\text{H}]$                       | 5.41                      | 8.58                      | –                                          | –                         | 8.16                         | –                            |
|                                                                            | $[\text{MH}_3\text{L}]/[\text{MH}_2\text{L}]\times[\text{H}]$              | –                         | 5.54                      | –                                          | –                         | –                            | –                            |
|                                                                            | $[\text{ML}]/[\text{MLOH}]\times[\text{H}]$                                | 11.72                     | 11.31                     | 8.06 (8.48)                                | 10.28                     | –                            | –                            |
|                                                                            | $[\text{M}_2\text{L}]/[\text{ML}]\times[\text{M}]$                         | –                         | 6.53                      | –                                          | –                         | –                            | –                            |
|                                                                            | $[\text{M}_2\text{L}]/[\text{M}_2\text{LOH}]\times[\text{H}]$              | 9.71*                     | 8.41                      | –                                          | –                         | 7.55*                        | –                            |
|                                                                            | $[\text{M}_2\text{LOH}]/[\text{M}_2\text{L}(\text{OH})_2]\times[\text{H}]$ | 9.91                      | 9.74                      | –                                          | –                         | 9.5                          | –                            |
| $\text{Cd}^{2+}$                                                           | $[\text{ML}]/[\text{M}]\times[\text{L}]$                                   | 10.19                     | 9.49                      | 8.77 (9.759)                               | –                         | 9.46                         | –                            |
|                                                                            | $[\text{MHL}]/[\text{ML}]\times[\text{H}]$                                 | 8.61                      | 9.36                      | –                                          | –                         | 9.89                         | –                            |
|                                                                            | $[\text{MH}_2\text{L}]/[\text{MHL}]\times[\text{H}]$                       | 6.70                      | 8.93                      | –                                          | –                         | 8.23                         | –                            |
|                                                                            | $[\text{MH}_3\text{L}]/[\text{MH}_2\text{L}]\times[\text{H}]$              | –                         | 6.33                      | –                                          | –                         | –                            | –                            |
|                                                                            | $[\text{ML}]/[\text{MLOH}]\times[\text{H}]$                                | –                         | 11.88                     | 9.62 (10.30)                               | –                         | –                            | –                            |
|                                                                            | $[\text{M}_2\text{L}]/[\text{ML}]\times[\text{M}]$                         | 4.00                      | 4.69                      | –                                          | –                         | –                            | –                            |
|                                                                            | $[\text{M}_2\text{L}]/[\text{M}_2\text{LOH}]\times[\text{H}]$              | 8.69                      | –                         | –                                          | –                         | 4.19*                        | –                            |
|                                                                            | $[\text{M}_2\text{LOH}]/[\text{M}_2\text{L}(\text{OH})_2]\times[\text{H}]$ | 8.91                      | –                         | –                                          | –                         | 9.69                         | –                            |

<sup>a</sup> Present work. <sup>b</sup>  $I = 0.1 \text{ mol dm}^{-3} \text{ KNO}_3$ , ref. 23. <sup>c</sup>  $I = 0.1 \text{ mol dm}^{-3} \text{ NMe}_4\text{Cl}$ , ref. 10. <sup>d</sup>  $I = 0.15 \text{ mol dm}^{-3} \text{ NaClO}_4$ , ref. 20. <sup>e</sup>  $I = 0.1 \text{ mol dm}^{-3} \text{ KCl}$ , ref. 21. <sup>f</sup>  $I = 0.15 \text{ mol dm}^{-3} \text{ NaCl}$ , ref. 22. \*  $\log \beta_{\text{M}_m\text{H}_h\text{L}_l}$

| <b>Table S2.</b> pM values determined for the complexes of the indicated ligands and divalent metal ions. <sup>a</sup> |                  |          |         |
|------------------------------------------------------------------------------------------------------------------------|------------------|----------|---------|
| Ion                                                                                                                    | Ligand           | pH = 7.5 | pH = 11 |
| Ni <sup>2+</sup>                                                                                                       | L <sup>1b</sup>  | 5.44     | 9.91    |
|                                                                                                                        | L <sup>2b</sup>  | 5.21     | 10.93   |
|                                                                                                                        | L <sup>7c</sup>  | –        | –       |
|                                                                                                                        | L <sup>12d</sup> | 4.63     | 9.61    |
|                                                                                                                        | L <sup>13e</sup> | 2.81     | 7.39    |
| Cu <sup>2+</sup>                                                                                                       | L <sup>1b</sup>  | 10.61    | 16.66   |
|                                                                                                                        | L <sup>2b</sup>  | 10.19    | 15.38   |
|                                                                                                                        | L <sup>7c</sup>  | 8.15     | 14.50   |
|                                                                                                                        | L <sup>12d</sup> | 9.18     | 15.88   |
|                                                                                                                        | L <sup>13e</sup> | 6.21     | 11.61   |
| Zn <sup>2+</sup>                                                                                                       | L <sup>1b</sup>  | 5.37     | 10.83   |
|                                                                                                                        | L <sup>2b</sup>  | 5.31     | 11.25   |
|                                                                                                                        | L <sup>7c</sup>  | 6.35     | 14.35   |
|                                                                                                                        | L <sup>12d</sup> | 3.70     | 10.08   |
|                                                                                                                        | L <sup>13e</sup> | 3.41     | 10.03   |
| Cd <sup>2+</sup>                                                                                                       | L <sup>1b</sup>  | 3.87     | 9.26    |
|                                                                                                                        | L <sup>2b</sup>  | 3.74     | 7.36    |
|                                                                                                                        | L <sup>7c</sup>  | –        | –       |
|                                                                                                                        | L <sup>12d</sup> | 3.31     | 8.13    |
|                                                                                                                        | L <sup>13e</sup> | –        | –       |

<sup>a</sup> C<sub>L</sub> = 1.67×10<sup>-3</sup> mol dm<sup>-3</sup>; T = 298.2 K, using the Hyss program, ref. 28. <sup>b</sup> I = 0.10 mol dm<sup>-3</sup> in KNO<sub>3</sub>. <sup>c</sup> I = 0.10 mol dm<sup>-3</sup> in NMe<sub>4</sub>Cl. <sup>d</sup> I = 0.15 mol dm<sup>-3</sup> in NaClO<sub>4</sub>. <sup>e</sup> I = 0.1 mol dm<sup>-3</sup> KCl.

**Table S3** Spectroscopic UV-vis-NIR data for the mono- and dinuclear complexes of Ni<sup>2+</sup> and Cu<sup>2+</sup> with L<sup>1</sup> and L<sup>2</sup> at 298.2 K

| Complex (M:L ratio)                    | pH (color)         | $\lambda_{\max}$ /nm ( $\epsilon/\text{dm}^3 \text{ mol}^{-1} \text{ cm}^{-1}$ )                                                                               |
|----------------------------------------|--------------------|----------------------------------------------------------------------------------------------------------------------------------------------------------------|
| Ni <sup>2+</sup> /L <sup>1</sup> (1:1) | 7.5 (purple)       | > 1300, 1165 (sh., 1.9), 950 (sh., 1.5), 770 (5.6), 580 (13.4), 408 (sh., 16.9), 370 (45.0), 290 (1.5×10 <sup>3</sup> ), 264 (5.2×10 <sup>3</sup> )            |
|                                        | 11.12 (light blue) | 1165 (sh., 19.3), 950 (sh., 23.2), 770 (sh., 26.9), 570 (66.6), 420 (sh., 101.8), 354 (193.4), 290 (1.5×10 <sup>3</sup> ), 264 (4.9×10 <sup>3</sup> )          |
| Ni <sup>2+</sup> /L <sup>1</sup> (2:1) | 9.4 (pale green)   | 1165 (sh., 10.6), 950 (sh., 14.6), 770 (sh., 18.4), 580 (50.0), 420 (sh., 70.3), 370 (sh., 181.6), 308 (sh., 1.5×10 <sup>3</sup> ), 264 (6.0×10 <sup>3</sup> ) |
| Ni <sup>2+</sup> /L <sup>2</sup> (1:1) | 7.8 (light blue)   | 1175 (sh., 1.8), 952 (sh., 1.2), 752 (3.0), 584 (9.2), 376 (32.9), 288 (sh., 1.9×10 <sup>3</sup> ), 262 (4.7×10 <sup>3</sup> )                                 |
|                                        | 10.8 (light blue)  | 1175 (sh., 9.8), 952 (sh., 11.2), 752 (sh., 12.3), 584 (23.3), 410 (sh., 31.0), 370 (64.5), 288 (1.8×10 <sup>3</sup> ), 264 (4.3×10 <sup>3</sup> )             |
| Ni <sup>2+</sup> /L <sup>2</sup> (2:1) | 8.9 (light blue)   | 1175 (sh., 29.9), 952 (sh., 34.1), 709 (sh., 45.6), 570 (67.5), 410 (sh., 90.5), 370 (136.3), 288 (2.4×10 <sup>3</sup> ), 262 (5.8×10 <sup>3</sup> )           |
|                                        | 11.4 (light blue)  | 1175 (sh., 44.3), 952 (sh., 50.6), 702 (sh., 72.9), 570 (93.6), 410 (sh., 129.6), 370 (sh., 184.5), 288 (2.2×10 <sup>3</sup> ), 262 (4.9×10 <sup>3</sup> )     |
| Cu <sup>2+</sup> /L <sup>1</sup> (1:1) | 4.3 (blue)         | 910 (sh., 15.6), 624 (271.7), 284 (sh., 5.3×10 <sup>3</sup> ), 266 (9.9×10 <sup>3</sup> )                                                                      |
|                                        | 7.15 (purple)      | 910 (sh., 21.2), 728 (sh., 87.2), 622 (211.7), 294 (sh., 4.2×10 <sup>3</sup> ), 276 (4.7×10 <sup>3</sup> ), 264 (6.2×10 <sup>3</sup> )                         |
| Cu <sup>2+</sup> /L <sup>1</sup> (2:1) | 10.57 (blue)       | 910 (sh., 31.5), 728 (sh., 81.2), 622 (203.3), 292 (sh., 3.7×10 <sup>3</sup> ), 280 (3.7×10 <sup>3</sup> ), 264 (7.2×10 <sup>3</sup> )                         |
|                                        | 8.2 (blue)         | 938 (sh., 49.0), 774 (sh., 72.9), 622 (294.7), 414 (sh., 183.5), 394 (sh., 226.5), 296 (4.8×10 <sup>3</sup> ), 264 (1.1×10 <sup>4</sup> )                      |
|                                        | 11.4 (pale green)  | 938 (sh., 92.1), 774 (sh., 113.5), 588 (175.5), 412 (sh., 216.3), 304 (3.9×10 <sup>3</sup> ), 266 (5.4×10 <sup>3</sup> )                                       |
| Cu <sup>2+</sup> /L <sup>2</sup> (1:1) | 4.7 (light blue)   | 922 (sh., 12.3), 781 (sh., 41.9), 620 (214.3), 292 (3.2×10 <sup>3</sup> ), 282 (sh., 2.8), 264 (6.2×10 <sup>3</sup> )                                          |
|                                        | 7.2 (purple)       | 922 (sh., 23.0), 781 (sh., 45.1), 620 (192.5), 416 (sh., 69.0), 292 (3.2×10 <sup>3</sup> ), 280 (sh., 3.1×10 <sup>3</sup> ), 264 (6.4×10 <sup>3</sup> )        |
| Cu <sup>2+</sup> /L <sup>2</sup> (2:1) | 11.2 (light blue)  | 922 (sh., 26.0), 781 (sh., 36.5), 630 (102.6), 420 (sh., 35.5), 294 (3.3×10 <sup>3</sup> ), 264 (6.4×10 <sup>3</sup> )                                         |
|                                        | 7.8 (blue)         | 953 (sh., 54.2), 790 (sh., 62.5), 626 (201.9), 416 (sh., 92.7), 302 (2.7×10 <sup>3</sup> ), 280 (3.2×10 <sup>3</sup> ), 264 (5.1×10 <sup>3</sup> )             |
|                                        | 11.4 (light blue)  | 953 (sh., 71.2), 790 (sh., 96.9), 614 (283.1), 426 (sh., 275.4), 298 (3.8×10 <sup>3</sup> ), 264 (7.7×10 <sup>3</sup> )                                        |
